# Supplementary material for: Preparation of efficient oligomer-based bulk-heterojunction solar cells from eco-friendly solvents
Source: Royal Society of Chemistry journal article supplement (doi:10.1039/c7tc02131c), 2017-01-01
Supplement: c7tc02131c1.pdf [file c7tc02131c1.pdf]

## Supporting Information

### Preparation of efficient oligomer-based bulk-heterojunction solar cells with eco-friendly solvents

Duško Popović,<sup>a</sup> Ibrahim Ata,<sup>a</sup> Johannes Krantz,<sup>a</sup> Sebastian Lucas,<sup>a</sup> Mika Lindén,<sup>b</sup> Elena Mena-Osteritz<sup>a</sup> and Peter Bäuerle<sup>a\*</sup>

<sup>a</sup>*Institute of Organic Chemistry II and Advanced Materials, Ulm University, Albert-Einstein-Allee 11, 89081 Ulm, Germany*

<sup>b</sup>*Institute of Inorganic Chemistry II, Ulm University, Albert-Einstein-Allee 11, 89081 Ulm, Germany*

\*E-mail: [peter.baeuerle@uni-ulm.de](mailto:peter.baeuerle@uni-ulm.de)

**Table S1.** Overview of reported oligomer-based BHJSC with the respectively obtained PCEs using various halogen-free solvents.

| Solvent                         | Blend                               | PCE [%] | Reference |
|---------------------------------|-------------------------------------|---------|-----------|
| Tetrahydrofuran                 | SM:PC <sub>71</sub> BM              | 2.65    | [1]       |
| Benzaldehyde/mesitylene (80:20) | N(Ph-2T-DCN-Et)/PC <sub>71</sub> BM | 3.75    | [2]       |
| 2-Methyltetrahydrofuran         | X2:PC <sub>61</sub> BC <sub>8</sub> | 5.10    | [3]       |
| <i>o</i> -Xylene + 1% MN        | DPPEZnP-O:PC <sub>61</sub> BM       | 5.85    | [4]       |
| Toluene                         | SMPV1:PC <sub>71</sub> BM           | 7.04    | [5]       |
| Toluene/CPME (40:60)            | SMPV1:PC <sub>61</sub> BM           | 8.10    | [6]       |
| Carbon disulfide                | BDTTNTTR: PC <sub>71</sub> BM       | 10.02   | [7]       |
| Carbon disulfide                | BDTSTNTTR: PC <sub>71</sub> BM      | 11.53   | [7]       |

**Table S2.** Solubility parameters and melting temperatures of co-oligomers **1-3** investigated in this study.

| Oligomer | Solubility in chloroform [mg mL <sup>-1</sup> ] | Solubility in ethyl acetate [mg mL <sup>-1</sup> ] | Solubility in toluene [mg mL <sup>-1</sup> ] | Solubility in <i>o</i> -xylene [mg mL <sup>-1</sup> ] | <i>T</i> <sub>m</sub> [°C] <sup>a</sup> |
|----------|-------------------------------------------------|----------------------------------------------------|----------------------------------------------|-------------------------------------------------------|-----------------------------------------|
| <b>1</b> | 15                                              | 7                                                  | 2                                            | >80                                                   | 181                                     |
| <b>2</b> | >120 <sup>b</sup>                               | 3                                                  | <1                                           | 26                                                    | 183 <sup>b</sup>                        |

<sup>a</sup>Melting temperatures ( $T_m$ ) were determined using differential scanning calorimetry. <sup>b</sup>see ref. 8. <sup>c</sup>see ref. 9.

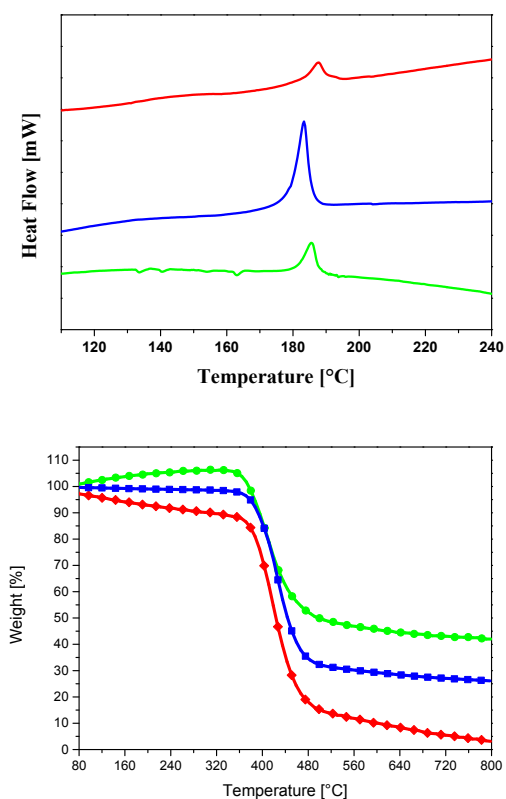

**Figure S1.** TGA and DSC traces of oligomers **1** (green curve), **2** (blue curve), and **3** (red curve).

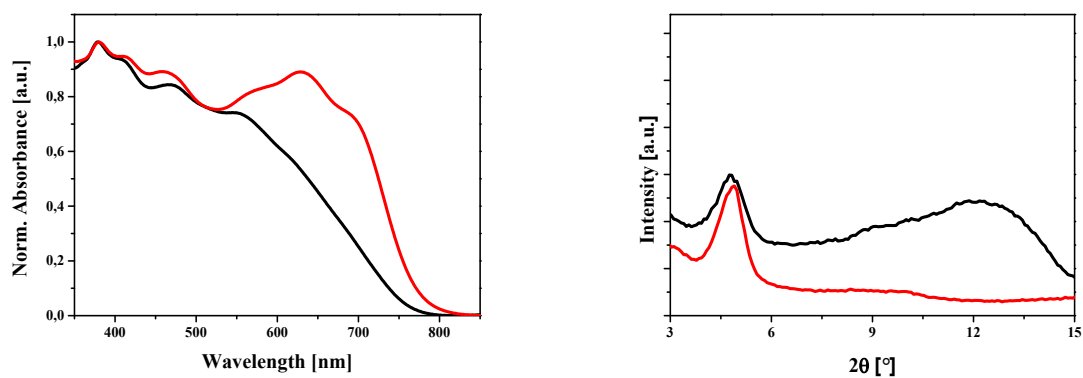

**Figure S2.** Absorption spectra (left) and GIXRD diffraction patterns (right) of blends containing co-oligomer **2** and PC<sub>71</sub>BM (1:2) before (black line) and after SVA (red line). The film was deposited by doctor-blading on a PEDOT:PSS coated glass substrate.

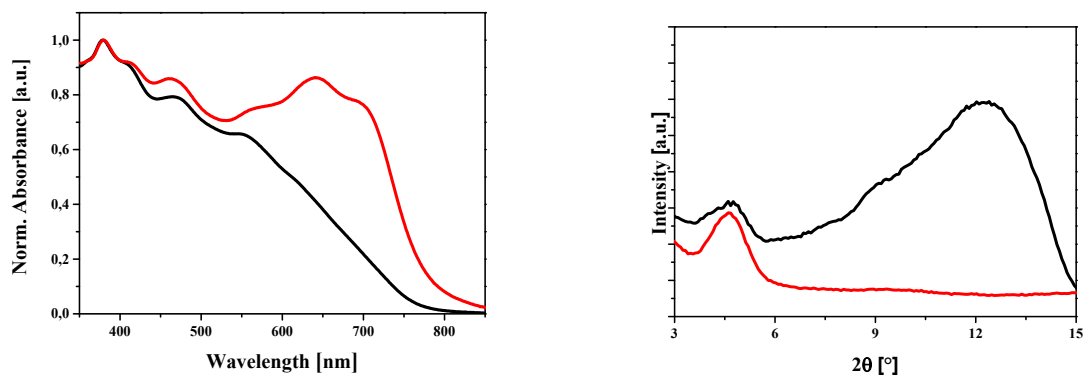

**Figure S3.** Absorption spectra (left) and GIXRD diffraction patterns (right) of blends containing co-oligomer **3** and PC<sub>71</sub>BM (1:2) before (black line) and after SVA (red line). The film was deposited by doctor-blading on a PEDOT:PSS coated glass substrate.

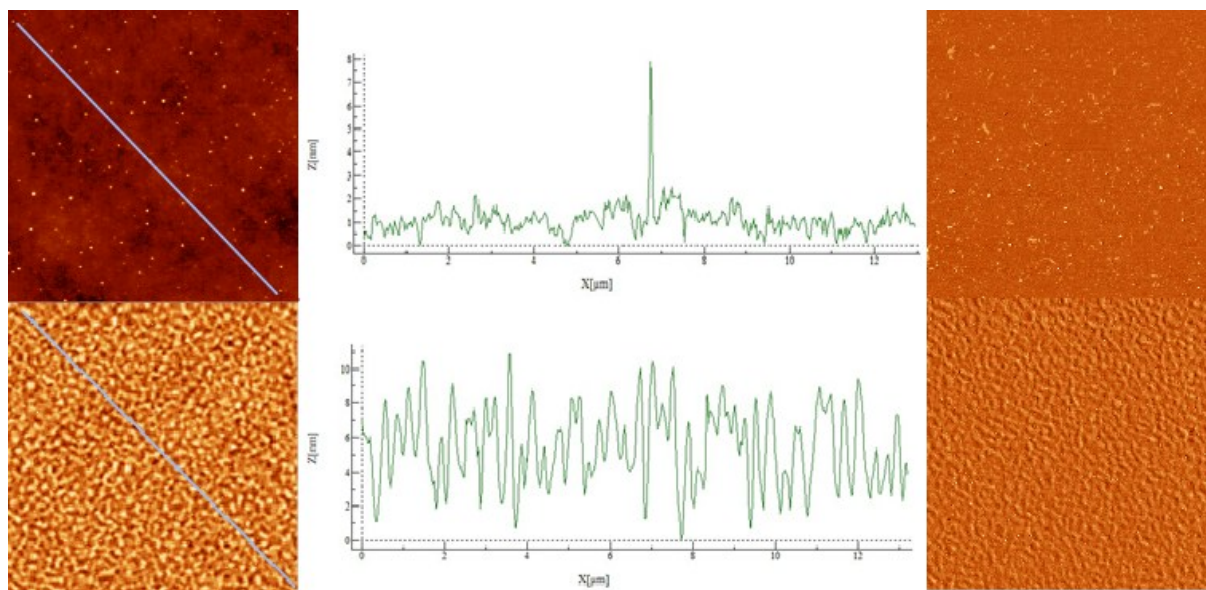

**Figure S4.** AFM images ( $10 \times 10 \mu\text{m}^2$ ) of the topography ( $\Delta z = 10 \text{ nm}$ ), height profile, and phase ( $\Delta\theta = 20^\circ$ ) of the photoactive blend of **1**:PC<sub>71</sub>BM deposited by doctor-blading on PEDOT:PSS|glass before (top) and after (bottom) SVA. The average roughness before and after SVA treatment were determined to be 0.55 nm and 1.76 nm, respectively.

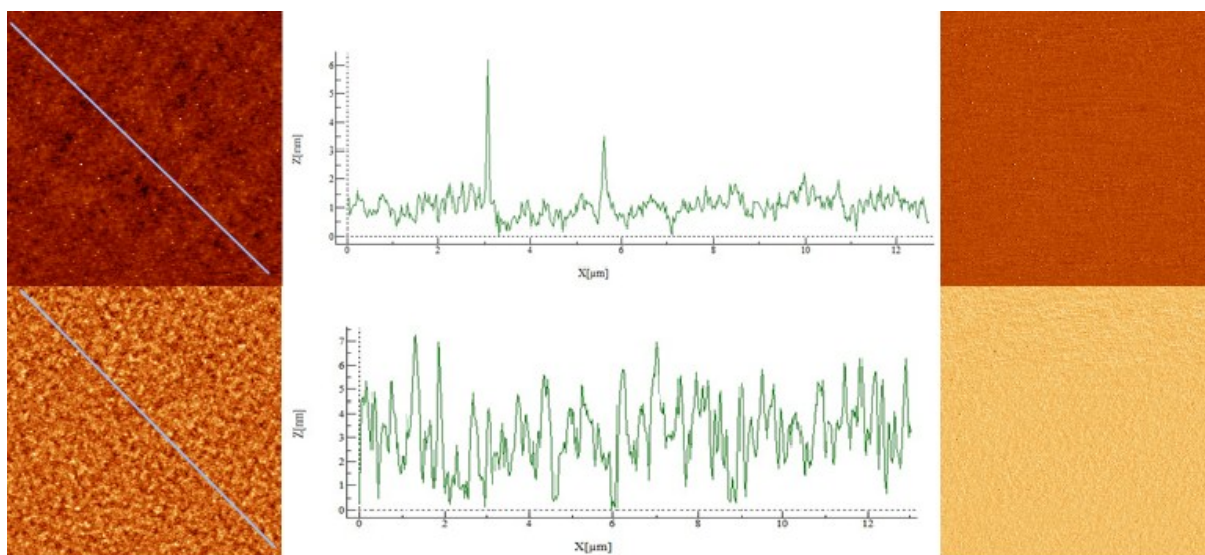

**Figure S5.** AFM images ( $10 \times 10 \mu\text{m}^2$ ) of the topography ( $\Delta z = 10 \text{ nm}$ ), height profile, and phase ( $\Delta\theta = 20^\circ$ ) of the photoactive blend of 2:PC<sub>71</sub>BM deposited by doctor-blading on PEDOT:PSS|glass before (top) and after (bottom) SVA. The average roughness before and after SVA treatment were determined to be 0.31 nm and 1.10 nm, respectively.

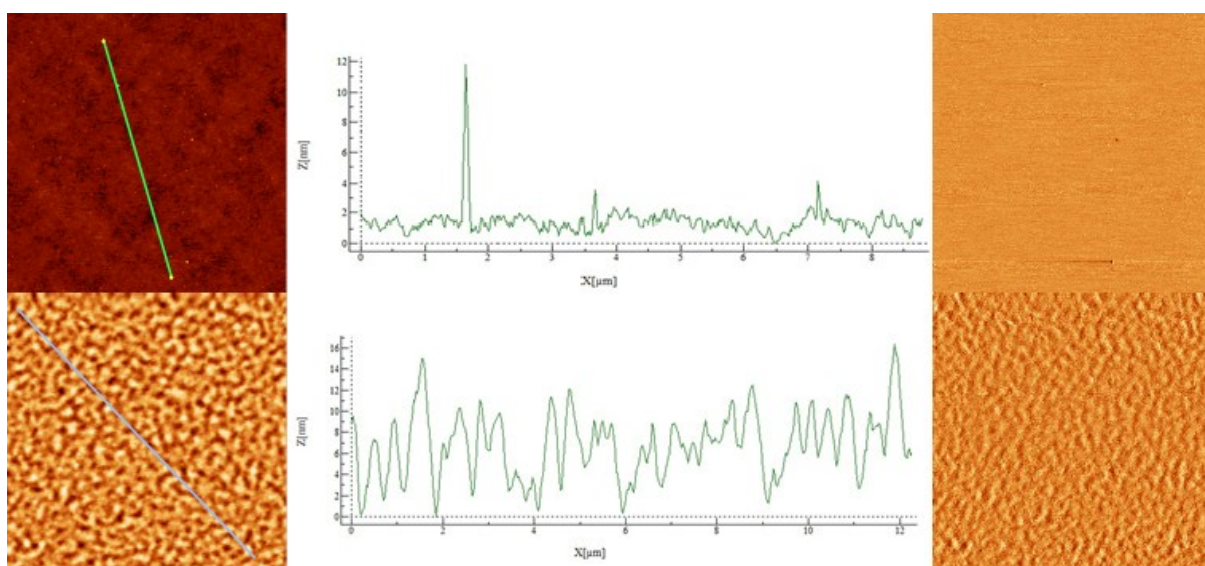

**Figure S6.** AFM images ( $10 \times 10 \mu\text{m}^2$ ) of the topography ( $\Delta z = 10 \text{ nm}$ ), height profile, and phase ( $\Delta\theta = 20^\circ$ ) of the photoactive blend of 3:PC<sub>71</sub>BM deposited by doctor-blading on PEDOT:PSS|glass before (top) and after (bottom) SVA. The average roughness before and after SVA treatment were determined to be 0.30 nm and 2.19 nm, respectively.

## References

1. M. Singh, R. Kurchania, J. A. Mikroyannidis, S. S. Sharma and G. D. Sharma, *J. Mater. Chem. A*, 2013, **1**, 2297-2306.
2. I. Burgués-Ceballos, F. Machui, J. Min, T. Ameri, M. M. Voigt, Y. N. Luponosov, S. A. Ponomarenko, P. D. Lacharmoise, M. Campoy-Quiles and C. J. Brabec, *Adv. Funct. Mater.*, 2014, **24**, 1449-1457.

3. X. Chen, X. Liu, M. A. Burgers, Y. Huang and G. C. Bazan, *Angew. Chem. Int. Ed.*, 2014, **53**, 14378-14381.
4. L. Xiao, C. Liu, K. Gao, Y. Yan, J. Peng, Y. Cao and X. Peng, *RSC Adv.*, 2015, **5**, 92312-92317.
5. M. E. Farahat, C.-S. Tsao, Y.-C. Huang, S. H. Chang, W. Budiawan, C.-G. Wu and C.-W. Chu, *J. Mater. Chem. A*, 2016, **4**, 7341-7351.
6. M. E. Farahat, P. Perumal, W. Budiawan, Y.-F. Chen, C.-H. Lee and C.-W. Chu, *J. Mater. Chem. A*, 2017, **5**, 571-582.
7. J. Wan, X. Xu, G. Zhang, Y. Li, K. Feng and Q. Peng, *Energy Environ. Sci.*, 2017, **10**, 1739-1745,
8. I. Ata, S. B. Dkhil, M. Pfannmöller, S. Bals, D. Duché, J.-J. Simon, T. Koganezawa, N. Yoshimoto C. Videlot-Ackermann, O. Margeat, J. Ackermann and P. Bäuerle, *Org. Chem. Front.* (submitted 21.3.2017, QO-RES-03-2017-000222)
9. C. D. Wessendorf, G. L. Schulz, A. Mishra. P. Kar, I. Ata, M. Weidener, M. Urdanpilleta, J. Hanisch, E. Mena-Osteritz, M. Lindén, E. Ahlswede and P. Bäuerle, *Adv. Energy Mater.*, 2014, **4**, 1400266-1400276.
